# Supplementary material for: High Occurrence of Multidrug-Resistant Escherichia coli Strains in Bovine Fecal Samples from Healthy Cows Serves as Rich Reservoir for AMR Transmission
Source: MDPI journal article supplement (doi:10.3390/antibiotics12010037), 2022-12-26
Supplement: s1 [file s1]

**Supplementary Table S1:** List of antibiotics used in this study along with their measure of each categorization

| S. No | Antibiotic                 | Abbreviation | Concentration (µg) | Sensitive (S) | Intermediate (I) | Resistant (R) |
|-------|----------------------------|--------------|--------------------|---------------|------------------|---------------|
| 1.    | Amoxicillin                | AML          | 10                 | ≥ 17          | 14-16            | ≤ 13          |
| 2.    | Ampicillin                 | AMP          | 10                 | ≥ 17          | 14-16            | ≤ 13          |
| 3     | Amoxicillin-clavulanate /. | AMC          | 20/10              | ≥ 18          | 14-17            | ≤ 13          |
| 4.    | Doxycycline                | DO           | 30                 | ≥ 14          | 11-13            | ≤ 10          |
| 5.    | Tetracycline               | TE           | 30                 | ≥ 15          | 12-14            | ≤ 11          |
| 6.    | Piperacillin-tazobactam    | TZP          | 100/10             | ≥ 21          | 18-20            | ≤ 17          |
| 7.    | Eratapenem                 | ETP          | 10                 | ≥ 22          | 19-21            | ≤ 18          |
| 8.    | Meropenem                  | MEM          | 10                 | ≥ 23          | 20-22            | ≤ 19          |
| 9.    | Imipenem                   | IPM          | 10                 | ≥ 23          | 20-22            | ≤ 19          |
| 10.   | Gentamicin                 | CN           | 10                 | ≥ 15          | 13-14            | ≤ 12          |
| 11.   | Tobramycin                 | TOB          | 10                 | ≥ 15          | 13-14            | ≤ 12          |
| 12.   | Streptomycin               | S            | 10                 | ≥ 15          | 12-14            | ≤ 11          |
| 13.   | Ciprofloxacin              | CIP          | 05                 | ≥ 21          | 16-20            | ≤ 15          |
| 14.   | Norfloxacin                | NOR          | 10                 | ≥ 17          | 13-16            | ≤ 12          |
| 15.   | Levofloxacin               | LEV          | 05                 | ≥ 17          | 14-16            | ≤ 13          |
| 16.   | SXT                        | SXT          | 25                 | ≥ 16          | 11-15            | ≤ 10          |
| 17.   | Nitrofurantoin             | F            | 300                | ≥ 17          | 15-16            | ≤ 14          |
| 18.   | Erythromycin               | E            | 15                 | ≥ 22          | 17-21            | ≤ 18          |
| 19.   | Ceftriaxone                | CRO          | 30                 | ≥ 23          | 20-22            | ≤ 19          |
| 20.   | Cefotaxime                 | CTX          | 30                 | ≥ 26          | 23-25            | ≤ 22          |
| 21.   | Ceftazidime                | CAZ          | 30                 | ≥ 21          | 18-20            | ≤ 17          |
| 22.   | Amikacin                   | AK           | 30                 | ≥ 17          | 15-16            | ≤ 14          |
| 23.   | Cefepime                   | FEP          | 30                 | ≥ 25          | 19-24            | ≤ 18          |
| 24.   | Cefoxitin                  | FOX          | 30                 | ≥ 18          | 15-17            | ≤ 14          |
| 25.   | Chloramphenicol            | C            | 30                 | ≥ 18          | 13-17            | ≤ 12          |
| 26.   | Ofloxacin                  | OFX          | 05                 | ≥ 16          | 13-15            | ≤ 12          |

**Supplementary Table S2:** List of primers used in this study

| Sr. No | Gene                          | Primers (5'-3') |                               | Amplicon Size (bp) | Nucleotides | Reference  |
|--------|-------------------------------|-----------------|-------------------------------|--------------------|-------------|------------|
| 1.     | <i>uidA</i>                   | F               | CCCTTACGCTGAAGAGATGC          | 401                | 20          | This Study |
|        |                               | R               | GGCACAGCACATCAAAGAGA          |                    | 20          |            |
| 2.     | <i>chuA</i>                   | F               | GACGAACCAACGGTCAGGAT          | 279                | 20          | 01         |
|        |                               | R               | TGCCGCCAGTACCAAAGACA          |                    | 20          |            |
| 3.     | <i>yjaA</i>                   | F               | TGAAGTGTGAGGAGACGCTG          | 211                | 20          | 01         |
|        |                               | R               | ATGGAGAATGCGTTCCTCAAC         |                    | 21          |            |
| 4.     | <b>TSPE4.C2</b>               | F               | GAGTAATGTCGGGGCATTCA          | 152                | 20          | 01         |
|        |                               | R               | CGCGCCAACAAAGTATTACG          |                    | 20          |            |
| 5.     | <i>mcr-1</i>                  | F               | AGTCCGTTTGTCTTGTGGC           | 320                | 20          | 02         |
|        |                               | R               | AGATCCTTGGTCTCGGCTTG          |                    | 20          |            |
| 6.     | <i>mcr-2</i>                  | F               | CAAGTGTGTTGGTCGCAGTT          | 715                | 20          | 02         |
|        |                               | R               | TCTAGCCCGACAAGCATACC          |                    | 20          |            |
| 7.     | <i>bla</i> <b>KPC</b>         | F               | TGTCACTGTATCGCCGTC            | 900                | 18          | 03         |
|        |                               | R               | CTCAGTGCTCTACAGAAAACC         |                    | 21          |            |
| 8.     | <i>bla</i> <b>IMP</b>         | F               | GAAGGCGTTTATGTTTCATAC         | 587                | 20          | 04         |
|        |                               | R               | GTACGTTTCAAGAGTGATGC          |                    | 20          |            |
| 9.     | <i>bla</i> <b>VIM</b>         | F               | GTTTGGTCGCATATCGCAAC          | 389                | 20          | 04         |
|        |                               | R               | AATGCGCAGCACCAGGATAG          |                    | 20          |            |
| 10.    | <i>bla</i> <b>NDM</b>         | F               | GCAGCTTGTCGGCCATGCGGGC        | 782                | 22          | 05         |
|        |                               | R               | GGTCGCGAAGCTGAGCACCGCAT       |                    | 23          |            |
| 11.    | <i>bla</i> <b>OXA-48-like</b> | F               | GCGTGGTTAAGGATGAACAC          | 438                | 20          | 06         |
|        |                               | R               | CATCAAGTTCAACCCAACCG          |                    | 20          |            |
| 12.    | <i>bla</i> <b>SHV</b>         | F               | ATGCGTTATATTCGCCTGTG          | 747                | 20          | 07         |
|        |                               | R               | TGCTTTGTTATTCGGGCCAA          |                    | 20          |            |
| 13.    | <i>bla</i> <b>TEM</b>         | F               | TCGCCGCATACACTATTCTCAGAATGA   | 445                | 27          | 07         |
|        |                               | R               | ACGCTCACCGGCTCCAGATTAT        |                    | 23          |            |
| 14.    | <i>bla</i> <b>CTX</b>         | F               | ATGTGCAGYACCAGTAARGTKATGGC    | 593                | 26          | 07         |
|        |                               | R               | TGGGTRAARTARGTSACCAGAAYCAGCGG |                    | 29          |            |

|     |                  |   |                             |      |    |            |
|-----|------------------|---|-----------------------------|------|----|------------|
| 15. | <i>iss</i>       | F | GTTATTTTCTGCCGCTCTGG        | 227  | 20 | This Study |
|     |                  | R | AACCGAGCAATCCATTACG         |      | 20 |            |
| 16. | <i>papC</i>      | F | AATAAAAACGTGGCGGACTG        | 440  | 20 | This Study |
|     |                  | R | TATCCTTTCTGCAGGGATGC        |      | 20 |            |
| 17. | <i>cvaC</i>      | F | CCTCCTACCCTTCACTCTTG        | 501  | 20 | This Study |
|     |                  | R | GGATGGAGACATTGCAGGAT        |      | 20 |            |
| 18. | <i>kpsMT III</i> | F | TCCTCTTGCTACTATCCCCCT       | 392  | 22 | 08         |
|     |                  | R | AGGCGTATCCATCCCTCCTAAC      |      | 22 |            |
| 19. | <i>papA</i>      | F | ATGGCAGTGGTGTTTTGGTG        | 717  | 20 | 08         |
|     |                  | R | CGTCCCACCATACGTGCTCTTC      |      | 22 |            |
| 20. | <i>fimH</i>      | F | TCGAGAACGGATAAGCCGTGG       | 508  | 21 | 08         |
|     |                  | R | GCAGTCACCTGCCCTCCGGTA       |      | 21 |            |
| 21. | <i>papEF</i>     | F | GCAACAGCAACGCTGGTTGCATCAT   | 326  | 25 | 08         |
|     |                  | R | AGAGAGAGCCACTCTTATACGGACA   |      | 25 |            |
| 22. | <i>ireA</i>      | F | GATGACTCAGCCACGGGTAA        | 254  | 20 | 08         |
|     |                  | R | CCAGGACTCACCTACGAAT         |      | 20 |            |
| 23. | <i>ibeA</i>      | F | AGGCAGGTGTGCGCCGCGTAC       | 171  | 21 | 08         |
|     |                  | R | TGGTGCTCCGGCAAACCATGC       |      | 21 |            |
| 24. | <i>PAI</i>       | F | GGACATCCTGTTACAGCGCGCA      | 925  | 22 | 08         |
|     |                  | R | TCGCCACCAATCACAGCCGAAC      |      | 22 |            |
| 25. | <i>cnf-I</i>     | F | ATCTTATACTGGATGGGATCATCTTGG | 1105 | 27 | 08         |
|     |                  | R | GCAGAACGACGTTCTTCATAAGTATC  |      | 26 |            |
| 26. | <i>fyuA</i>      | F | TGATTAACCCCGCGACGGGAA       | 787  | 21 | 08         |
|     |                  | R | CGCAGTAGGCACGATGTTGTA       |      | 21 |            |
| 27. | <i>iroN</i>      | F | AAGTCAAAGCAGGGGTTGCCCG      | 667  | 22 | 08         |
|     |                  | R | GATCGCCGACATTAAGACGCAG      |      | 22 |            |
| 28. | <i>bmaE</i>      | F | ATGGCGCTAACTTGCCATGCTG      | 507  | 22 | 08         |
|     |                  | R | AGGGGGACATATAGCCCCCTTC      |      | 22 |            |
| 29. | <i>sfa</i>       | F | CTCCGGAGAACTGGGTGCATCTTAC   | 410  | 25 | 08         |
|     |                  | R | CGGAGGAGTAATTACAAACCTGGCA   |      | 25 |            |
| 30. | <i>iutA</i>      | F | GGCTGGACATCATGGGAACTGG      | 302  | 22 | 08         |

|     |                   |   |                                  |     |    |    |
|-----|-------------------|---|----------------------------------|-----|----|----|
|     |                   | R | CGTCGGGAACGGGTAGAATCG            |     | 21 |    |
| 31. | <b>papG</b>       | F | GGCCTGCAATGGATTACCTGG            | 258 | 22 | 08 |
|     |                   | R | CCACCAAATGACCATGCCAGAC           |     | 22 |    |
| 32. | <b>kpsMT (K1)</b> | F | TAGCAAACGTTCTATTGGTGC            | 153 | 21 | 08 |
|     |                   | R | Used with <i>kpsM II</i> Reverse |     | 23 |    |
| 33. | <b>foc</b>        | F | CAGCACAGGCAGTGGATACGA            | 364 | 21 | 08 |
|     |                   | R | GAATGTCGCCTGCCATTGCT             |     | 21 |    |
| 34. | <b>afa</b>        | F | GGCAGAGGGCCGGCAACAGGC            | 594 | 21 | 08 |
|     |                   | R | CCCGTAACGCGCCAGCATCTC            |     | 21 |    |
| 35. | <b>kpsM II</b>    | F | GCGCATTTGCTGATACTGTTG            | 272 | 21 | 08 |
|     |                   | R | CATCCAGACGATAAGCATGAGCA          |     | 23 |    |
| 36. | <b>invE</b>       | F | CGATAGATGGCGAGAAATTATCCCG        | 766 | 27 | 09 |
|     |                   | R | CGATCAAGAATCCCTAACAGAAGAATCAC    |     | 29 |    |
| 37. | <b>aggR</b>       | F | ACGCAGAGTTGCCTGATAAAG            | 400 | 21 | 09 |
|     |                   | R | AATACAGAATCGTCAGCATCAGC          |     | 23 |    |
| 38. | <b>bfpB</b>       | F | GACACCTCATTGCTGAAGTCG            | 910 | 21 | 09 |
|     |                   | R | CCAGAACACCTCCGTTATGC             |     | 21 |    |
| 39. | <b>lt</b>         | F | GAACAGGAGGTTTCTGCGTTAGGTG        | 655 | 25 | 09 |
|     |                   | R | CTTTCAATGGCTTTTTTTGGGAGTC        |     | 26 |    |
| 40. | <b>stp</b>        | F | CCTCTTTTAGYCAGACARCTGAATCASTTG   | 157 | 30 | 09 |
|     |                   | R | CAGGCAGGATTACAACAAAGTTCACAG      |     | 27 |    |
| 41. | <b>sth</b>        | F | TGTCTTTTTCACCTTTCGCTC            | 171 | 21 | 09 |
|     |                   | R | CGGTACAAGCAGGATTACAACAC          |     | 23 |    |
| 42. | <b>stx1</b>       | F | AACTGGATGATCTCAGTGG              | 614 | 20 | 10 |
|     |                   | R | CTGAATCCCCCTCCATTATG             |     | 20 |    |
| 43. | <b>stx2</b>       | F | CCATGACAACGGACAGCAGTT            | 779 | 21 | 10 |
|     |                   | R | CCTGTCAACTGAGCAGCACTTTG          |     | 23 |    |
| 44. | <b>eaeA</b>       | F | GTGGCGAATACTGGCGAGACT            | 890 | 21 | 11 |
|     |                   | R | CCCCATTCTTTTACCCTGCG             |     | 21 |    |
| 45. | <b>hlyA</b>       | F | ACGATGTGGTTTATTCTGGA             | 165 | 20 | 12 |

|  |  |   |                      |  |    |  |
|--|--|---|----------------------|--|----|--|
|  |  | R | CTTCACGTGACCATACATAT |  | 20 |  |
|--|--|---|----------------------|--|----|--|

1. Clermont, O., Stéphane, B. & Edouard, B. Rapid and simple determination of the *Escherichia coli* phylogenetic group. *Appl. Environ. Microbiol.* **66**(10), 4555–4558, <https://doi.org/10.1128/AEM.66.10.4555-4558.2000> (2000).
2. Rebelo, A.R., Bortolaia, V., Kjeldgaard, J.S., Pedersen, S.K., Leekitcharoenphon, P., Hansen, I.M., Guerra, B., Malorny, B., Borowiak, M., Hammerl, J.A., Battisti, A., Franco, A., Alba, P., Perrin-Guyomard, A., Granier, S. A., De Frutos Escobar, C., Malhotra-Kumar, S., Villa, L., Carattoli, A., & Hendriksen, R.S. Multiplex PCR for detection of plasmid-mediated colistin resistance determinants, *mcr-1*, *mcr-2*, *mcr-3*, *mcr-4* and *mcr-5* for surveillance purposes. *Euro surveillance : bulletin Europeen sur les maladies transmissibles = European communicable disease bulletin*, **23**(6), 17-00672, <https://doi.org/10.2807/1560-7917.ES.2018.23.6.17-00672> (2018).
3. Yigit, H., Queenan, A.M., Anderson, G.J., Domenech-Sanchez, A., Biddle, J.W., Steward, C.D., Alberti, S., Bush, K., & Tenover, F.C. Novel carbapenem-hydrolyzing beta-lactamase, *KPC-1*, from a carbapenem-resistant strain of *Klebsiella pneumoniae*. *Antimicrob. Agents Chemother.* **45**(4), 1151–1161, <https://doi.org/10.1128/AAC.45.4.1151-1161.2001> (2001).
4. Pitout, J. D., Gregson, D.B., Poirel, L., McClure, J.A., Le, P. & Church, D.L. Detection of *Pseudomonas aeruginosa* producing metallo-beta-lactamases in a large centralized laboratory. *J. Clin. Microbiol.* **43**(7), 3129–3135, <https://doi.org/10.1128/JCM.43.7.3129-3135.2005> (2005).
5. Peirano, G., Ahmed-Bentley, J., Woodford, N. & Pitout, J. D. New Delhi metallo-beta-lactamase from traveler returning to Canada. *Emerg. Infect. Dis.* **17**(2), 242–244, <https://doi.org/10.3201/eid1702.101313> (2011).
6. Poirel, L., Walsh, T.R., Cuvillier, V. & Nordmann, P. Multiplex PCR for detection of acquired carbapenemase genes. *Diagn. Microbiol. Infect. Dis.* **70**(1), 119–23. doi: 10.1016/j.diagmicrobio.2010.12.002 (2011).
7. Monstein, H.J., Ostholm-Balkhed, A., Nilsson, M.V., Nilsson, M., Dornbusch, K., Nilsson, L.E. Multiplex PCR amplification assay for the detection of *bla*<sup>SHV</sup>, *bla*<sup>TEM</sup> and *bla*<sup>CTX-M</sup> genes in Enterobacteriaceae. *APMIS* **115**(12), 1400–1408, doi: 10.1111/j.1600-0463.2007.00722.x. (2007).
8. Johnson J.R. & Stell A.L. Extended virulence genotypes of *Escherichia coli* strains from patients with urosepsis in relation to phylogeny and host compromise. *J. Infect. Dis.* **181**,261–272, (2000).
9. Yun, Z., Zeng, L., Huang, W. *et al.* Detection and Categorization of Diarrheagenic *Escherichia coli* with Auto-microfluidic Thin-film Chip Method. *Sci Rep* **8**, 12926, <https://doi.org/10.1038/s41598-018-30765-3> (2018).

10. Gannon, V.P.J., King, R.K., Kim, J.Y. & Golsteyn Thomas, E.J. Rapid and sensitive method for detection of Shiga-like toxin-producing *Escherichia coli* in ground beef using the polymerase chain reaction. *Appl. Environ. Microbiol.* **58**, 3809–3815, (1992).
11. Gannon, V.P.J., Souza, S.D., Graham, T., King, R.K., Rahn, K. & Read, S. Use of the flagellar H7 gene as a target in multiplex PCR assays and improved specificity in identification of enterohemorrhagic *Escherichia coli* strains. *J Clin Microbiol.* **35**, 656–662, (1997).
12. Fratamico, P.M., Sackitey, S.K., Wiedmann, M. & Deng, M.Y. Detection of *Escherichia coli* O157:H7 by multiplex PCR. *J Clin Microbiol.* **33**, 2188–2191, (1995).
